# Supplementary material for: Functionalization of ZnO aggregate films via iodine-doping and TiO2 decorating for enhanced visible-light-driven photocatalytic activity and stability
Source: Royal Society of Chemistry journal article supplement (doi:10.1039/c6ra00903d), 2016-01-01
Supplement: c6ra00903d1.pdf [file c6ra00903d1.pdf]

# Functionalization of ZnO Aggregate Films via Iodine-Doping and TiO<sub>2</sub> Decorating for Enhanced Visible-Light-Driven Photocatalytic Activity and Stability

*Yuan Wang<sup>a</sup>, Hua-Bin Fang<sup>a</sup>, Rong-Qin Ye<sup>a</sup>, Yan-Zhen Zheng<sup>a,b\*</sup>, Nan Li<sup>a</sup>, Xia*

*Tao<sup>a\*</sup>*

<sup>a</sup>State Key Laboratory of Organic-Inorganic Composites, Beijing University of Chemical Technology, Beijing 100029, China

<sup>b</sup>Research Center of the Ministry of Education for High Gravity Engineering & Technology, Beijing University of Chemical Technology, Beijing 100029, China

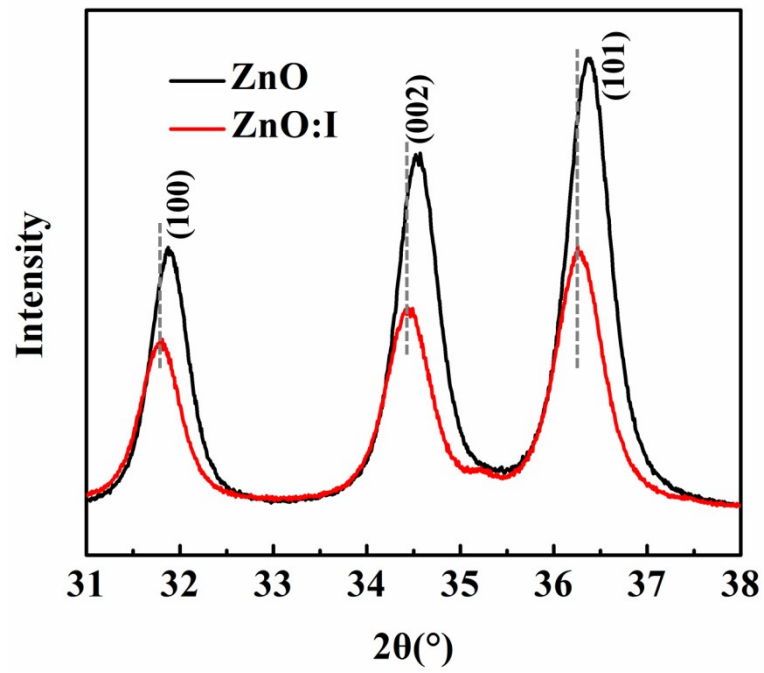

**Fig. S1.** The fine-scanned (100), (002), and (101) peaks of ZnO and ZnO:I, showing the peaks shifting due to the doping.

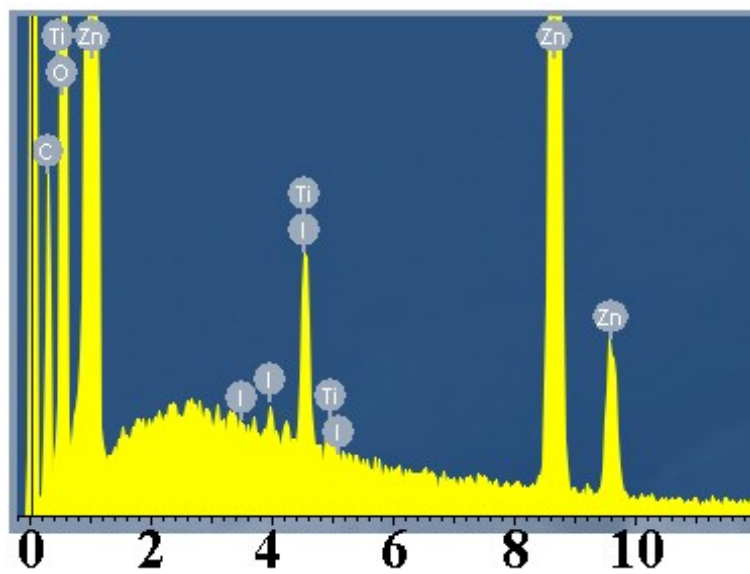

**Fig. S2.** EDS image of ZnO:I@TiO<sub>2</sub> aggregate film.

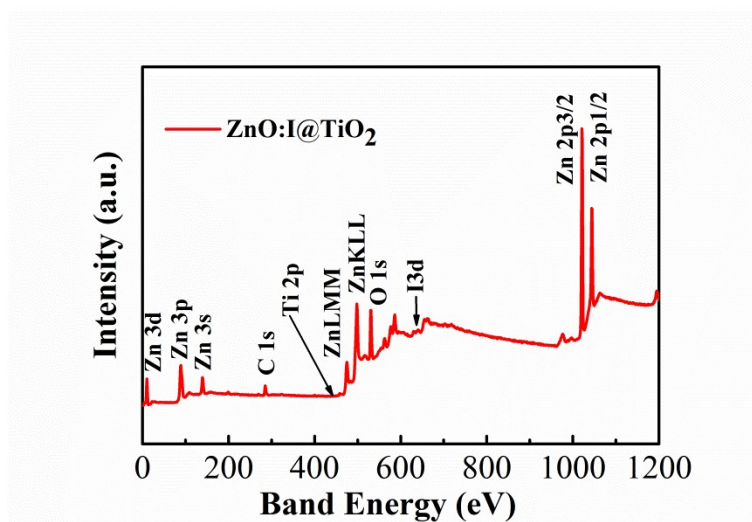

**Fig. S3.** XPS survey spectrum of ZnO:I@TiO<sub>2</sub> film.

**Table S1.** Photodegradation rate constants of RhB over different catalysts using  $\ln(C_0/C) = k_a t$  as fitting equation

| <b>Photocatalysts</b>      | <b>Ka [h<sup>-1</sup> ]</b> | <b>R<sup>2</sup></b> |
|----------------------------|-----------------------------|----------------------|
| Pure ZnO                   | 0.194                       | 0.999                |
| P25                        | 0.229                       | 0.991                |
| 2.5%ZnO:I                  | 0.361                       | 0.990                |
| 5.0%ZnO:I                  | 0.681                       | 0.999                |
| 7.5%ZnO:I                  | 0.496                       | 0.994                |
| 5.0%ZnO:I@TiO <sub>2</sub> | 0.855                       | 0.998                |
